# Supplementary material for: A new strategy for the construction of 3D TiO2 nanowires/reduced graphene oxide for high-performance lithium/sodium batteries
Source: Royal Society of Chemistry journal article supplement (doi:10.1039/c8ta08214f), 2018-01-01
Supplement: c8ta08214f1.pdf [file c8ta08214f1.pdf]

## **.Supporting Information**

**A new strategy to construct 3D TiO<sub>2</sub> nanowires/ reduced graphene**

**oxide for high-performance lithium/sodium batteries**

Jiage Yu, Hui Huang\*, Yongping Gan, Yang Xia, Chu Liang, Jun Zhang,

Xinyong Tao, Wenkui Zhang\*

*College of Materials Science and Engineering, Zhejiang University of Technology,*

*Hangzhou 310014, China*

E-mail address: [msechem@zjut.edu.cn](mailto:msechem@zjut.edu.cn)

*Corresponding Authors. Tel./fax: +86-571-88320394*

## **Table of Contents**

- 1. Figures**
- 2. Tables**
- 3. References**

# 1. Figures

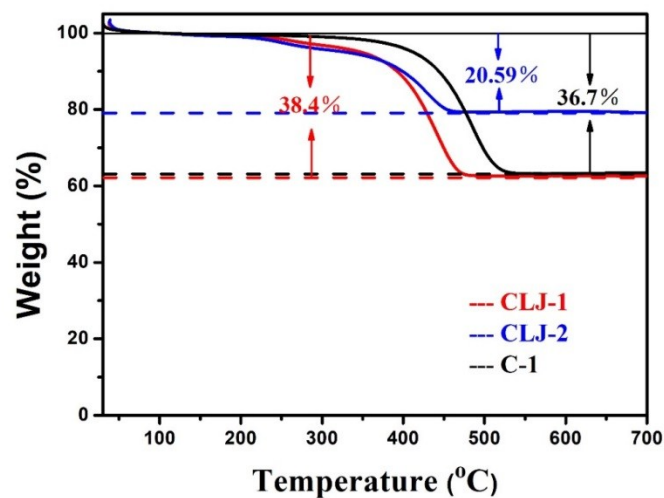

Fig. S1 TGA curves of C-1, CLJ-1 and CLJ-2 samples.

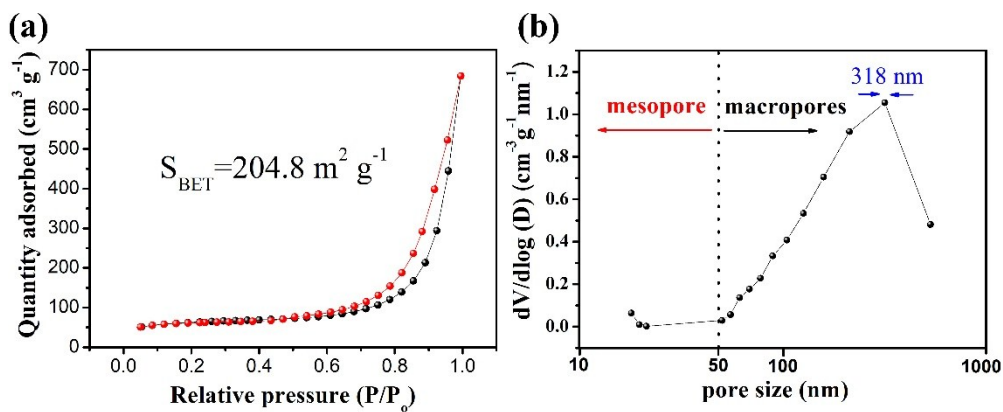

Fig. S2 (a) N<sub>2</sub> adsorption-desorption isotherms of CLJ-2; (b) Pore size distributions from the adsorption branch through the BJH method of CLJ-2.

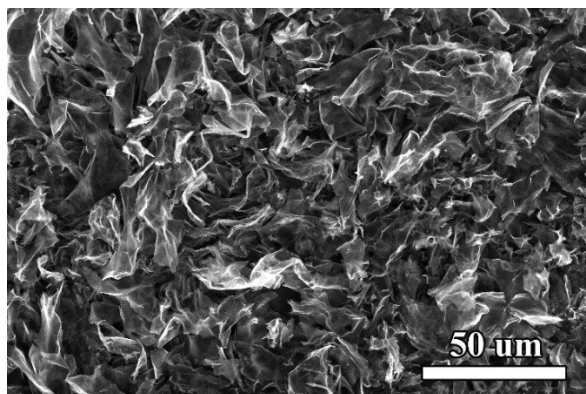

Fig. S3 The SEM image of CLJ-1.

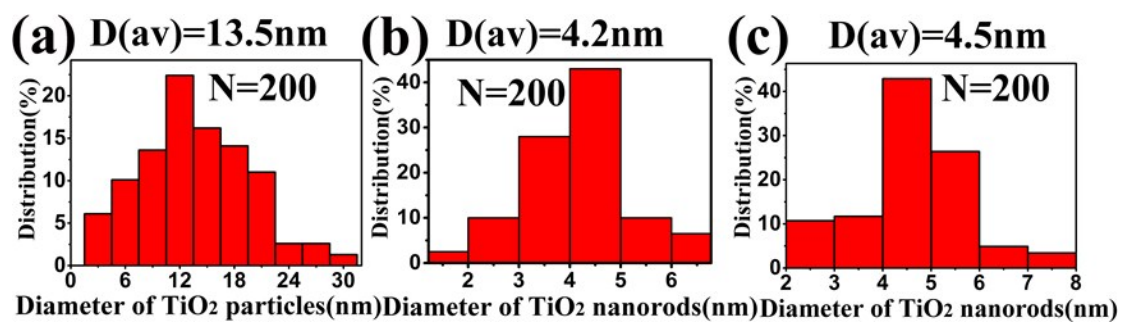

Fig. S4 Particle size distribution of C-1(a), CLJ-1(b) and CLJ-2 (c).

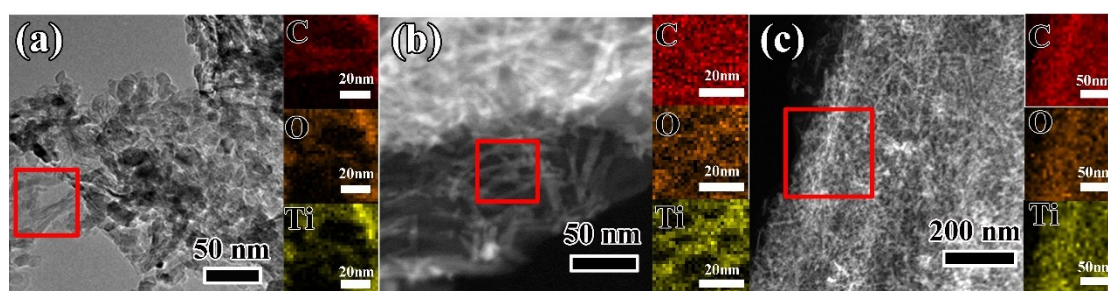

Fig. S5 The TEM mapping of C-1 (a), CLJ-1 (b) and CLJ-2 (c).

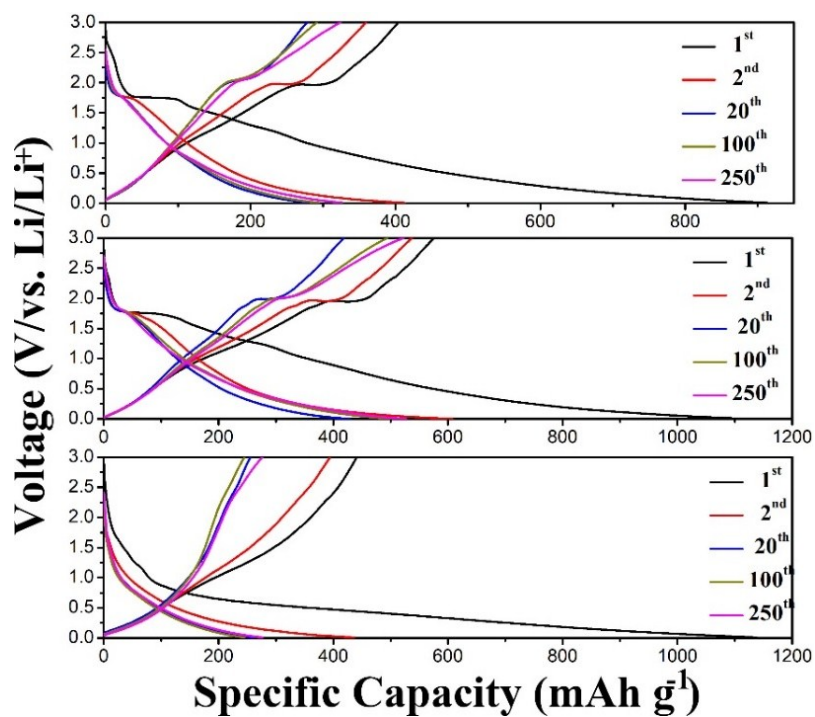

Fig. S6 Galvanostatic discharge/charge profiles of (a) C-1, (b) CLJ-2 and (c) RGO at 0.1 A g<sup>-1</sup>.

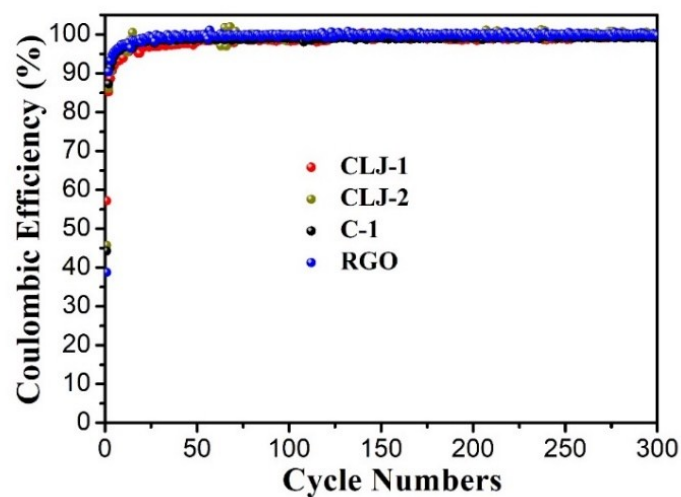

**Fig. S7** The coulombic efficiency of C-1, CLJ-1, CLJ-2 and RGO at 0.1A g<sup>-1</sup>.

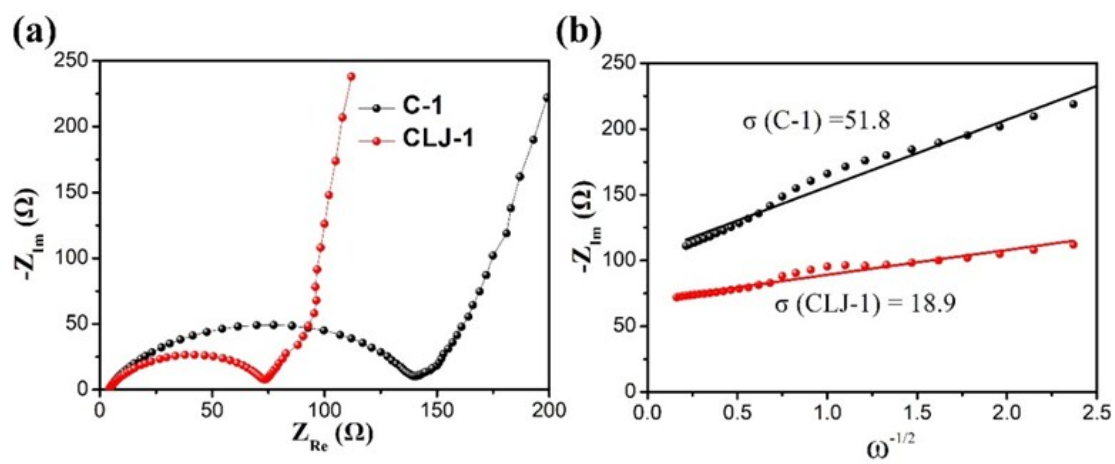

**Fig. S8** (a) Nyquist plots and (b) Warburg plots of C-1 and CLJ-1 for LIBs.

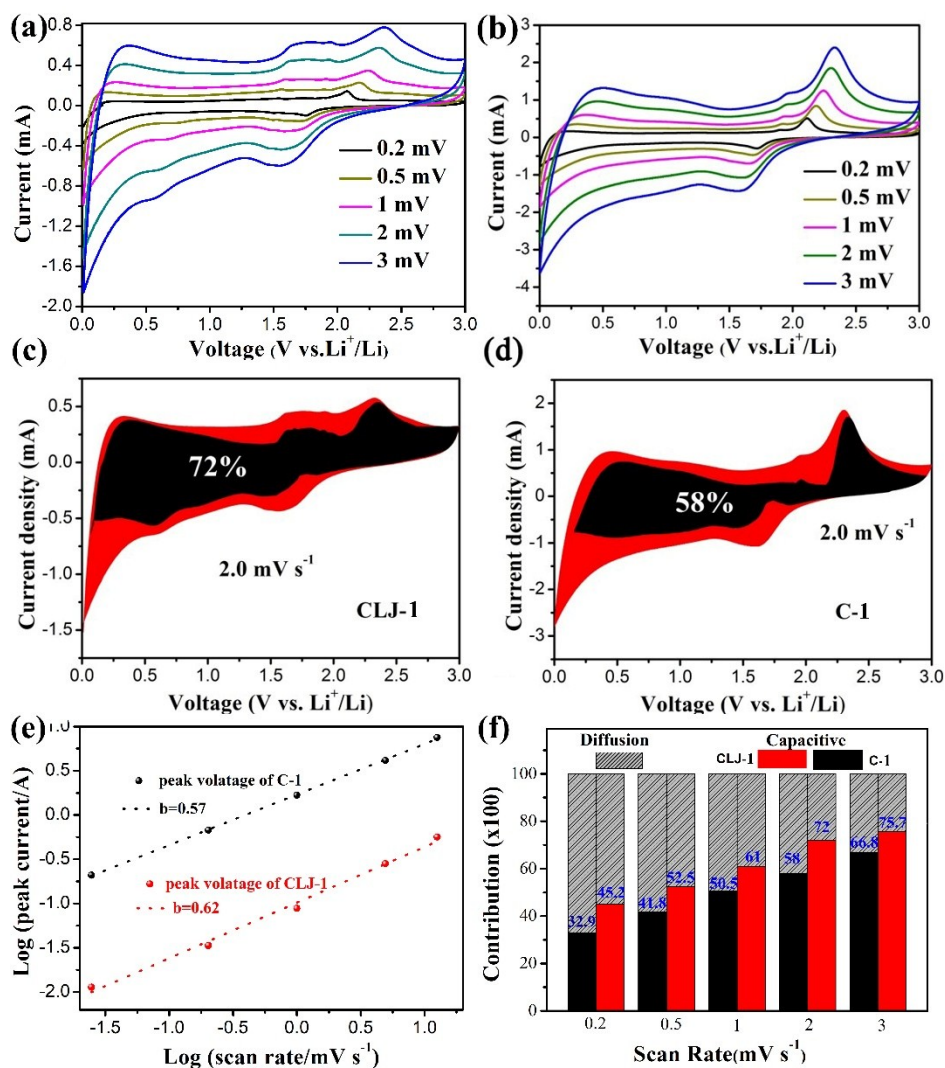

**Fig. S9** CV curves of CLJ-1 (a) and C-1 (b); Capacitive contribution of CLJ-1 (c) and C-1(b); (e) Relationship between logarithm cathodic peak current and logarithm scan rates; (f) Normalized contribution ratio of capacitive capacities at different scan rates.



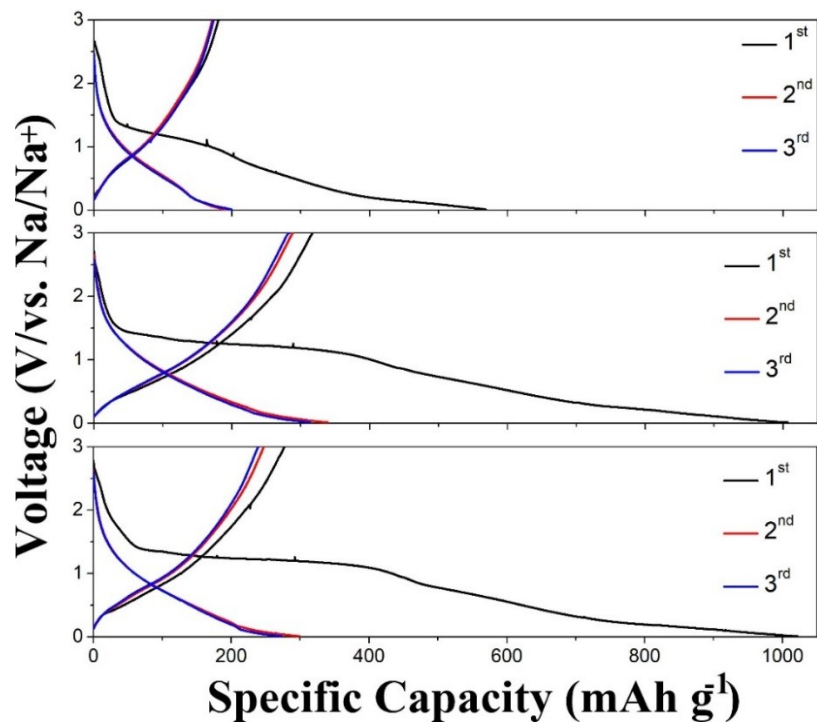

**Fig. S10** Galvanostatic discharge/charge profiles of (a) C-1, (b) CLJ-1, and (c) CLJ-2 at 50 mA g<sup>-1</sup>.

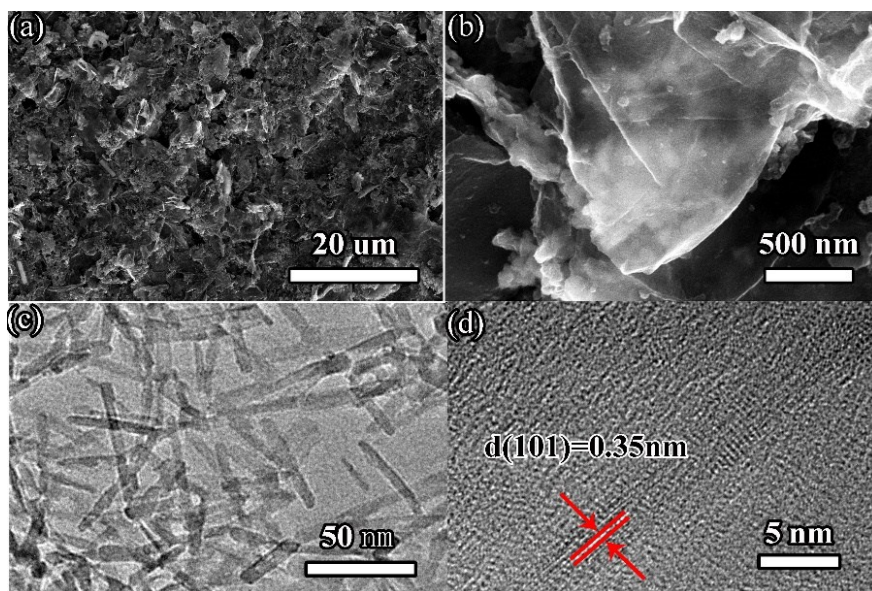

**Fig. S11** SEM images (a, b), TEM images (c, d) of CLJ-1 after 5000 cycles at 5 A g<sup>-1</sup>.

## 2. Tables

Table S1. Comparison of the electrochemical properties of various TiO<sub>2</sub>/graphene composite used as anode materials for Na<sup>+</sup> batteries.

| various TiO <sub>2</sub> /graphene composite                                                                 | Current (mA g <sup>-1</sup> ) | Capacity (mAh g <sup>-1</sup> ) @ cycle number | References |
|--------------------------------------------------------------------------------------------------------------|-------------------------------|------------------------------------------------|------------|
| 3D titania-graphene hybrid                                                                                   | 20                            | 200@50                                         | 1          |
| Mesoporous single-crystal-like TiO <sub>2</sub> -graphene nanocomposite                                      | 3350                          | 126@18000                                      | 2          |
| Graphene-rich wrapped petal-like rutile TiO <sub>2</sub> tuned by carbon dots                                | 3350                          | 74.6@4000                                      | 3          |
| Graphene-coupled titanium oxide                                                                              | 500                           | 120@4300                                       | 4          |
| Ultra-small TiO <sub>2</sub> coated reduced graphene oxide composite                                         | 2000                          | 84.6@ 500                                      | 5          |
| Ultrathin single-crystalline TiO <sub>2</sub> nanosheets anchored on graphene                                | 200                           | 200@700                                        | 6          |
| Hierarchical TiO <sub>2</sub> /C micro-nanospheres                                                           | 1000                          | 187@1000                                       | 7          |
| Carbon coated anatase TiO <sub>2</sub> mesocrystals                                                          | 3360                          | 90@5000                                        | 8          |
| Highly ordered three-dimensional TiO <sub>2</sub> @C nanotube arrays                                         | 200                           | 232@500                                        | 9          |
| N-doped rutile TiO <sub>2</sub> /C                                                                           | 33.6                          | 175.3@100                                      | 10         |
| Hierarchical porous nanosheets constructed by graphene-coated, interconnected TiO <sub>2</sub> nanoparticles | 3350                          | 126@20000                                      | 11         |
| Mesoporous TiO <sub>2</sub> nanosheets anchored on graphene                                                  | 3350                          | 90@10000                                       | 12         |
| Anatase TiO <sub>2</sub> -reduced graphene oxide nanostructures                                              | 168                           | 148@500                                        | 13         |
| Phases hybridizing and graphene-like TiO <sub>2</sub>                                                        | 100                           | 150@100                                        | 14         |
| CLJ-2                                                                                                        | 50<br>500<br>5000             | 247@100<br>165@2000<br>123@5000                | Our work   |

## 3. References

- [1] G.L. Xu, L. Xiao, T. Sheng, J. Liu, Y.X. Hu, T. Ma, R. Amine, Y. Xie, X. Zhang, Y. Liu, Y. Ren, C.J. Sun, S.M. Heald, J. Kovacevic, Y.H. Sehleier, C. Schulz, W.L. Mattis, S.G. Sun, H. Wiggers, Z. Chen, K. Amine, Electrostatic Self-Assembly Enabling Integrated Bulk and Interfacial Sodium Storage in 3D Titania-Graphene Hybrid, *Nano letters* 18(1) (2018) 336-346.
- [2] Z. Le, F. Liu, P. Nie, X. Li, X. Liu, Z. Bian, G. Chen, H.B. Wu, Y. Lu, Pseudocapacitive Sodium Storage in Mesoporous Single-Crystal-like TiO<sub>2</sub>-Graphene Nanocomposite Enables High-Performance Sodium-Ion Capacitors, *ACS nano* 11(3) (2017) 2952-2960.
- [3] Y. Zhang, C.W. Foster, C.E. Banks, L. Shao, H. Hou, G. Zou, J. Chen, Z. Huang, X. Ji, Graphene-Rich Wrapped Petal-Like Rutile TiO<sub>2</sub> tuned by Carbon Dots for High-Performance Sodium Storage, *Advanced materials* 28(42) (2016) 9391-9399.
- [4] C. Chen, Y. Wen, X. Hu, X. Ji, M. Yan, L. Mai, P. Hu, B. Shan, Y. Huang, Na<sup>(+)</sup> intercalation pseudocapacitance in graphene-coupled titanium oxide enabling ultra-fast sodium storage and long-term cycling, *Nature communications* 6 (2015) 6929.



- [5] Y. Liu, J. Liu, D. Bin, M. Hou, A.G. Tamirat, Y. Wang, Y. Xia, Ultrasmall TiO<sub>2</sub>-Coated Reduced Graphene Oxide Composite as a High-Rate and Long-Cycle-Life Anode Material for Sodium-Ion Batteries, *ACS applied materials & interfaces* 10(17) (2018) 14818-14826.
- [6] A. Shoaib, Y. Huang, J. Liu, J. Liu, M. Xu, Z. Wang, R. Chen, J. Zhang, F. Wu, Ultrathin single-crystalline TiO<sub>2</sub> nanosheets anchored on graphene to be hybrid network for high-rate and long cycle-life sodium battery electrode application, *Journal of Power Sources* 342 (2017) 405-413.
- [7] X. Ma, Z. Zhang, J. Tian, B. Xu, Q. Ping, B. Wang, Hierarchical TiO<sub>2</sub>/C micro–nano spheres as high-performance anode materials for sodium ion batteries, *Functional Materials Letters* 11(02) (2018) 1850021.
- [8] W. Zhang, T. Lan, T. Ding, N.-L. Wu, M. Wei, Carbon coated anatase TiO<sub>2</sub> mesocrystals enabling ultrastable and robust sodium storage, *Journal of Power Sources* 359 (2017) 64-70.
- [9] J. Yang, Z. Chen, H. Wang, F. Liang, R. Chen, R. Wu, Highly ordered three-dimensional TiO<sub>2</sub>@C nanotube arrays as freestanding electrode for sodium-ion battery, *Materials Letters* 207 (2017) 149-152.
- [10] H. He, H. Wang, D. Sun, M. Shao, X. Huang, Y. Tang, N-doped rutile TiO<sub>2</sub>/C with significantly enhanced Na storage capacity for Na-ion batteries, *Electrochimica Acta* 236 (2017) 43-52.
- [11] B. Li, B. Xi, Z. Feng, Y. Lin, J. Liu, J. Feng, Y. Qian, S. Xiong, Hierarchical Porous Nanosheets Constructed by Graphene-Coated, Interconnected TiO<sub>2</sub> Nanoparticles for Ultrafast Sodium Storage, *Advanced materials* 30(10) (2018).
- [12] R. Zhang, Y. Wang, H. Zhou, J. Lang, J. Xu, Y. Xiang, S. Ding, Mesoporous TiO<sub>2</sub> nanosheets anchored on graphene for ultra long life Na-ion batteries, *Nanotechnology* 29(22) (2018) 225401.
- [13] J.H. Kim, W. Choi, H.-G. Jung, S.H. Oh, K.Y. Chung, W.I. Cho, I.H. Oh, I.W. Nah, Anatase TiO<sub>2</sub> -reduced graphene oxide nanostructures with high-rate sodium storage performance, *Journal of Alloys and Compounds* 690 (2017) 390-396.
- [14] K. Huang, C. Yan, K. Wang, Y. Zhang, Z. Ju, Phases hybridizing and graphene-like TiO<sub>2</sub> for high-performance Na-ion batteries, *Journal of Alloys and Compounds* 687 (2016) 683-688.
